# Supplementary material
Source: publisher figshare collection journal article supplement (https://acs.figshare.com/ndownloader/files/30865117)
Supplement: Supplementary file 1 [file 30865117]

## Supporting Information

### HTL-Free $\text{Sb}_2(\text{S}, \text{Se})_3$ Solar Cells with an Optimal Detailed Balance Band Gap

Yue Lu<sup>†,‡,§</sup>, Kanghua Li<sup>†,§</sup>, Xuke Yang<sup>†</sup>, Shuaicheng Lu<sup>†</sup>, Sen Li<sup>†</sup>, Jiajia Zheng<sup>†,‡</sup>, Liuchong Fu<sup>†</sup>,  
Chao Chen<sup>\*,†</sup>, Jiang Tang<sup>\*\*,†</sup>

<sup>†</sup>Wuhan National Laboratory for Optoelectronics and School of Optical and Electronic Information,  
Huazhong University of Science and Technology, Wuhan 430074, Hubei, China

<sup>‡</sup>China-EU Institute for Clean and Renewable Energy, Huazhong University of Science and  
Technology, Wuhan 430074, Hubei, China

\*email: Email: cchen@mail.hust.edu.cn.

\*\*email: Email: jtang@mail.hust.edu.cn.

Saturated vapor pressure curves of  $\text{Sb}_2\text{Se}_3$  and  $\text{Sb}_2\text{S}_3$  sources.

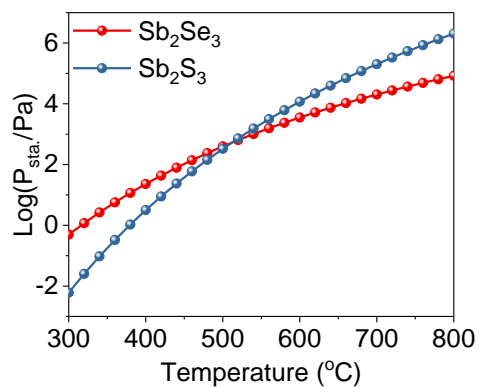

**Figure S1.** Temperature-dependent saturated vapor pressure of  $\text{Sb}_2\text{Se}_3$  and  $\text{Sb}_2\text{S}_3$  in the temperature range from 300 °C to 800 °C.

The temperature-time curves of  $\text{Sb}_2\text{Se}_3$  and  $\text{Sb}_2\text{S}_3$  sources.

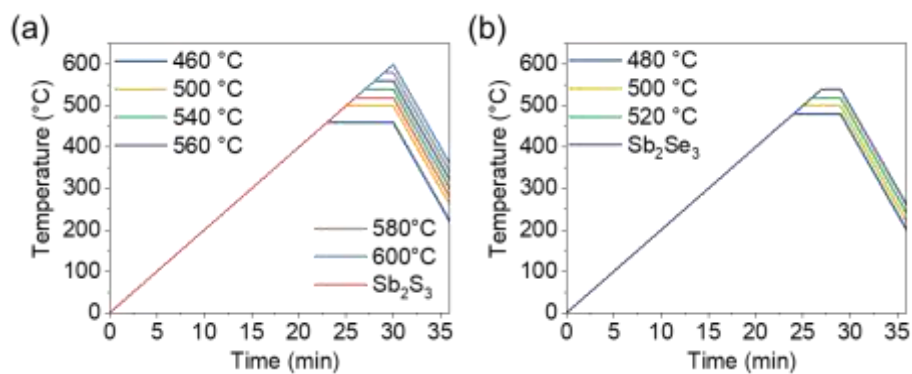

**Figure S2.** The temperature-time curves of  $\text{Sb}_2\text{Se}_3$  and  $\text{Sb}_2\text{S}_3$  sources when adjusted the evaporation temperatures of (a)  $\text{Sb}_2\text{Se}_3$  and (b)  $\text{Sb}_2\text{S}_3$ .

Top-view SEM images at different  $\text{Sb}_2\text{Se}_3$  source temperatures.

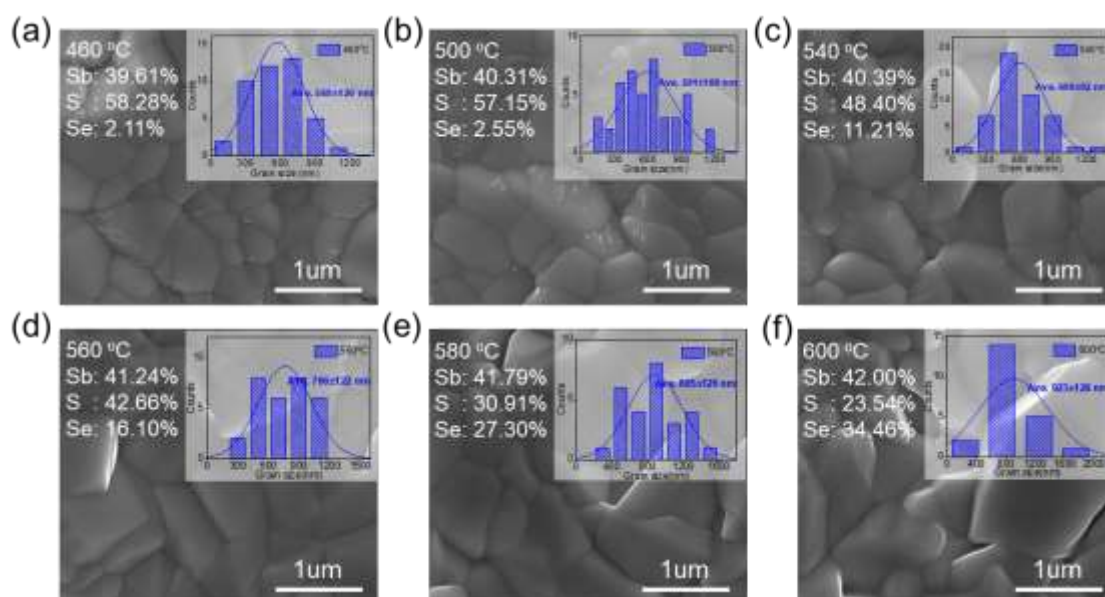

**Figure S3.** The top-view SEM images of the  $\text{Sb}_2(\text{S}, \text{Se})_3$  films under  $\text{Sb}_2\text{Se}_3$  source temperature of (a) 460 °C, (b) 500 °C, (c) 540 °C, (d) 560 °C, (e) 580 °C, (f) 600 °C. The average grain size are 569±120 nm, 591±100 nm, 609±92 nm, 766±122 nm, 885±126 nm, and 923±128 nm, respectively.

XRD diffraction pattern under different  $\text{Sb}_2\text{Se}_3$  source temperatures.

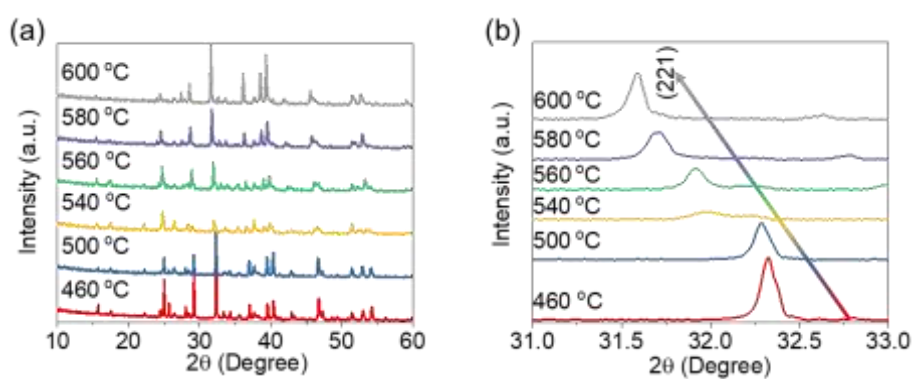

**Figure S4.** (a) The XRD of the  $\text{Sb}_2(\text{S}, \text{Se})_3$  films and (b) the enlarged [221] peaks of the  $\text{Sb}_2(\text{S}, \text{Se})_3$  films under different evaporating temperatures of the  $\text{Sb}_2\text{Se}_3$  source.

Transmission spectroscopy at different  $\text{Sb}_2\text{Se}_3$  source temperatures.

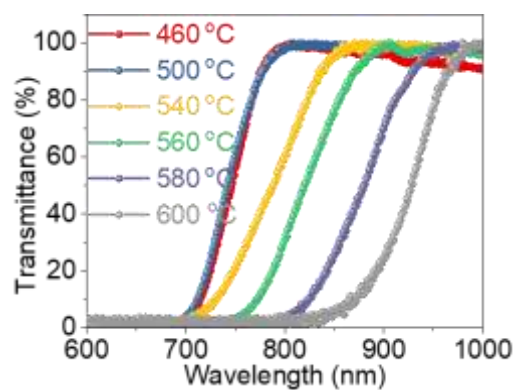

**Figure S5.** The UV-vis-NIR transmission spectroscopy of  $\text{Sb}_2(\text{S}, \text{Se})_3$  films under different evaporating temperatures of the  $\text{Sb}_2\text{Se}_3$  source.

Top-view SEM images at different  $\text{Sb}_2\text{S}_3$  source temperatures.

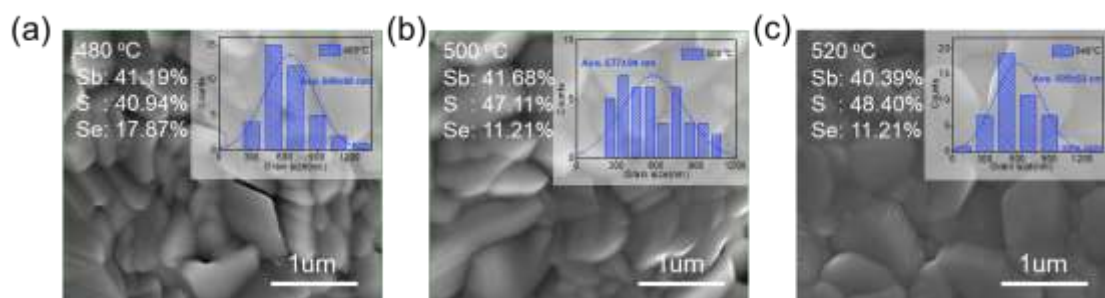

**Figure S6.** The top-view SEM images of  $\text{Sb}_2(\text{S}, \text{Se})_3$  films under  $\text{Sb}_2\text{S}_3$  source temperature of (a) 480 °C, (b) 500 °C, (c) 520 °C. The average grain size are  $649 \pm 90$  nm,  $577 \pm 94$  nm, and  $609 \pm 92$  nm, respectively.

XRD diffraction pattern at different  $\text{Sb}_2\text{S}_3$  source temperatures.

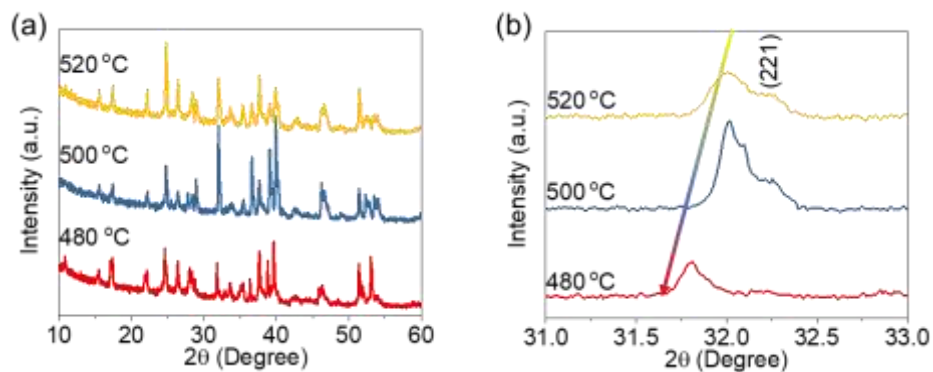

**Figure S7.** (a) The XRD of the  $\text{Sb}_2(\text{S}, \text{Se})_3$  films and (b) the enlarged [221] peaks of the  $\text{Sb}_2(\text{S}, \text{Se})_3$  films under different evaporating temperatures of the  $\text{Sb}_2\text{S}_3$  source.

Transmission spectroscopy under different  $\text{Sb}_2\text{S}_3$  source temperatures.

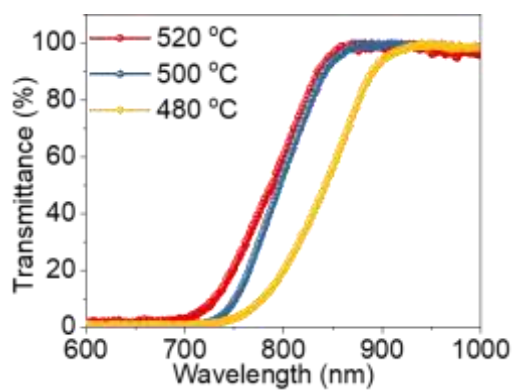

**Figure S8.** The UV-vis-NIR transmission spectroscopy of  $\text{Sb}_2(\text{S}, \text{Se})_3$  films under different evaporating temperatures of the  $\text{Sb}_2\text{S}_3$  source.

Schematic diagram of thin film light absorption.

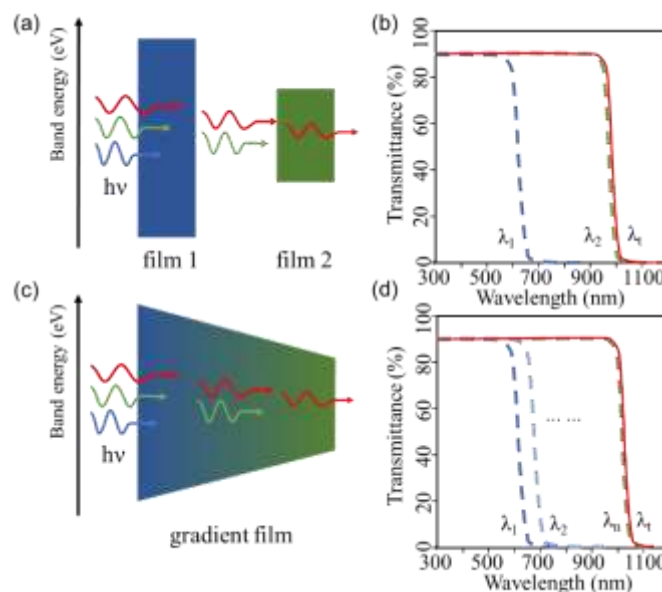

**Figure S9.** Schematic diagram of a beam of light passing through (a) two layers of films and (c) a gradient film. The schematic transmittance curves of (b) two layers of films and (d) a gradient film.

As shown in Figure S9a, when a beam of light separately passes through two films with different bandgaps, only high-energy photons are absorbed by the wide-bandgap film, and the absorption cutoff edge is expressed as  $\lambda_1$ . Whereas, the low-energy photons can further be absorbed by the thin film with a narrow bandgap, and the absorption cutoff edge is expressed as  $\lambda_2$ . When the light continuously passes through two layers of films, the absorption cutoff edge (expressed as  $\lambda_t$ ) is the same as that of the narrow bandgap film (Figure S9b). Further, when a beam of light continuously passes through a multilayer film (gradient bandgap film is the limiting case) (Figure S9c), high-energy photons are absorbed by the wide bandgap materials ( $\lambda_1, \lambda_2 \dots$ ), and only photons with energy lower than the narrowest bandgap are transmitted. Hence, the absorption cutoff edge (expressed as  $\lambda_t$ ) is similar to that of the narrowest bandgap film (expressed as  $\lambda_n$ ) (Figure S9d). As a result, the fitted bandgap through Tauc plot is determined by the narrowest bandgap in the film.

The heating process of the uniform  $\text{Sb}_2(\text{S}, \text{Se})_3$  films and bandgaps of  $\text{Sb}_2(\text{S}, \text{Se})_3$  films.

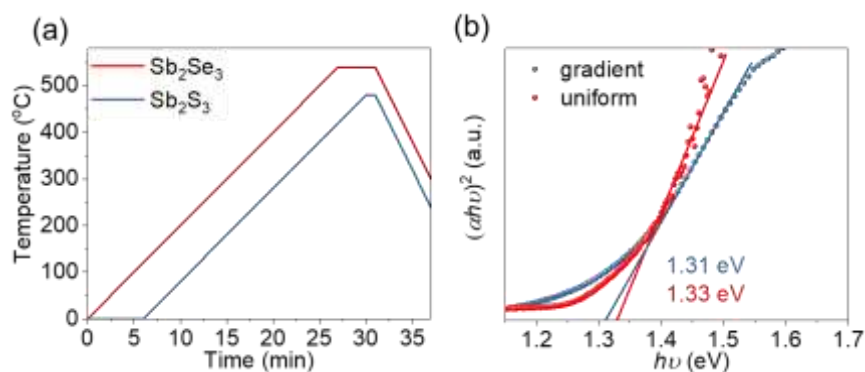

**Figure S10.** (a) The heating process of the uniform  $\text{Sb}_2(\text{S}, \text{Se})_3$  films. (b) Tauc plot of the gradient and uniform  $\text{Sb}_2(\text{S}, \text{Se})_3$  films.

$I/C^2$ - $V$  curves of the devices.

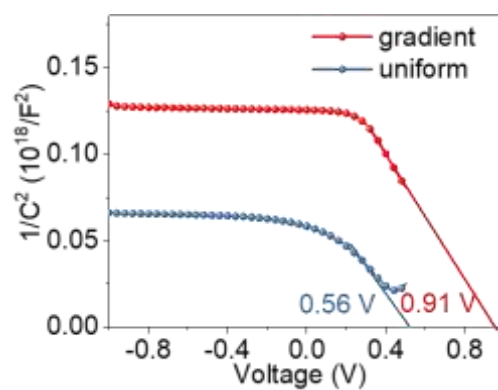

**Figure S11.**  $I/C^2$ - $V$  curves of the devices based on gradient and uniform  $\text{Sb}_2(\text{S}, \text{Se})_3$  films. The  $V_{bi}$  is 0.56 V and 0.91 V, respectively.

The bandgaps of the devices obtained from EQE data.

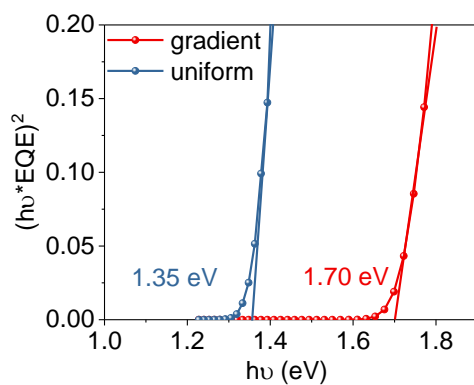

**Figure S12.** The bandgap of the devices based on gradient and uniform  $\text{Sb}_2(\text{S}, \text{Se})_3$  film obtained from EQE data.

The  $J$ - $V$  curves under different light intensities.

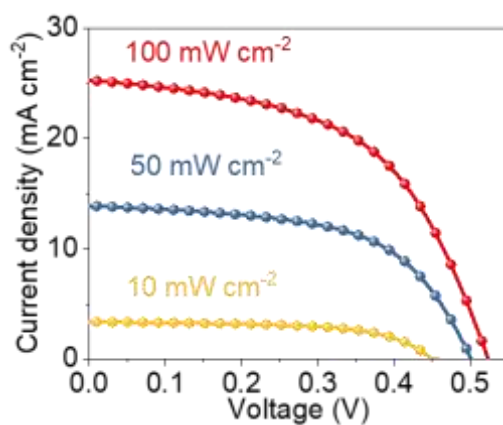

**Figure S13.** The  $J$ - $V$  curves of the optimal device under different light intensities.

Atomic and ionic radius.

**Table S1.** The Atomic and Ionic Radius of Sulfur and Selenium.<sup>1</sup>

| Radius                           | S (pm) | Se (pm) |
|----------------------------------|--------|---------|
| Atomic radius (M)                | 104    | 117     |
| Ionic radius ( $\text{M}^{2-}$ ) | 184    | 198     |



Material parameters for SCAPS simulation.

**Table S2.** The Basic Material Parameters for SCAPS Simulation in  $\text{Sb}_2(\text{S}, \text{Se})_3$  Solar Cells<sup>2-3</sup>

| Parameter                                                       | $\text{SnO}_2$       | $\text{CdS}$         | $\text{Sb}_2(\text{S}, \text{Se})_3$ |
|-----------------------------------------------------------------|----------------------|----------------------|--------------------------------------|
| Relative dielectric constant ( $\epsilon_r$ )                   | 9                    | 10                   | 15                                   |
| Bandgap (eV)                                                    | 3.6                  | 2.4                  | 1.3                                  |
| Electron Affinity (eV)                                          | 4.0                  | 4.0                  | 4.15                                 |
| Electron mobility ( $\text{cm}^2 \text{V}^{-1} \text{s}^{-1}$ ) | 100                  | 100                  | 10                                   |
| Hole mobility ( $\text{cm}^2 \text{V}^{-1} \text{s}^{-1}$ )     | 25                   | 25                   | 1                                    |
| $N_c$ ( $\text{cm}^{-3}$ )                                      | $2.2 \times 10^{18}$ | $2.2 \times 10^{18}$ | $1.0 \times 10^{18}$                 |
| $N_v$ ( $\text{cm}^{-3}$ )                                      | $1.8 \times 10^{19}$ | $1.8 \times 10^{19}$ | $1.8 \times 10^{20}$                 |
| Doping density ( $\text{cm}^{-3}$ )                             | $1.0 \times 10^{18}$ | $1.1 \times 10^{18}$ | $1.0 \times 10^{14}$                 |
| Thickness (nm)                                                  | 400                  | 60                   | 800                                  |

CdS trap states parameters for SCAPS simulation.

**Table S3.** The CdS Trap States Parameters for SCAPS Simulation in  $\text{Sb}_2(\text{S}, \text{Se})_3$  Solar Cells<sup>2-3</sup>

| Parameter                                        | Defect 1              |
|--------------------------------------------------|-----------------------|
| Defect type                                      | Single acceptor (-/0) |
| $E_t$ (eV) above $E_v$                           | 1.2                   |
| Electron capture cross section ( $\text{cm}^2$ ) | $1.0 \times 10^{-17}$ |
| Hole capture cross section ( $\text{cm}^2$ )     | $1.0 \times 10^{-12}$ |
| $N_t$ ( $\text{cm}^{-3}$ )                       | $1.0 \times 10^{18}$  |

$\text{Sb}_2(\text{S}, \text{Se})_3$  trap states parameters.

**Table S4.** The  $\text{Sb}_2(\text{S}, \text{Se})_3$  Trap States Parameters for SCAPS Simulation in  $\text{Sb}_2(\text{S}, \text{Se})_3$  Solar Cells<sup>2-4</sup>

| Parameter                                        | Defect 1              | Defect 2              | Defect 3              |
|--------------------------------------------------|-----------------------|-----------------------|-----------------------|
| Defect type                                      | Single acceptor (-/0) | Single acceptor (-/0) | Single donor (0/+)    |
| $E_t$ (eV) above $E_v$ (below $E_c$ )            | 0.48                  | 0.71                  | 0.61                  |
| Electron capture cross section ( $\text{cm}^2$ ) | $1.0 \times 10^{-15}$ | $1.0 \times 10^{-15}$ | $4.0 \times 10^{-13}$ |
| Hole capture cross section ( $\text{cm}^2$ )     | $1.5 \times 10^{-17}$ | $4.9 \times 10^{-13}$ | $1.0 \times 10^{-15}$ |
| $N_t$ ( $\text{cm}^{-3}$ )                       | $1.2 \times 10^{15}$  | $1.1 \times 10^{14}$  | $2.6 \times 10^{14}$  |

## References

- (1) Speight, J. *Lange's Handbook of Chemistry, Sixteenth Edition*; McGraw-Hill Education, New York, 2005; Vol. 4, pp 654-658.
- (2) Li, K.; Lu, Y.; Ke, X.; Li, S.; Lu, S.; Wang, C.; Wang, S.; Chen, C.; Tang, J. Over 7% Efficiency of  $\text{Sb}_2(\text{S,Se})_3$  Solar Cells via V-Shaped Bandgap Engineering. *Sol. RRL* **2020**, *4*, 2000220.
- (3) Chen, C.; Wang, L.; Gao, L.; Nam, D.; Li, D.; Li, K.; Zhao, Y.; Ge, C.; Cheong, H.; Liu, H.; et al. 6.5% Certified Efficiency  $\text{Sb}_2\text{Se}_3$  Solar Cells Using PbS Colloidal Quantum Dot Film as Hole-Transporting Layer. *ACS Energy Lett.* **2017**, *2*, 2125-2132.
- (4) Wen, X.; Chen, C.; Lu, S.; Li, K.; Kondrotas, R.; Zhao, Y.; Chen, W.; Gao, L.; Wang, C.; Zhang, J.; et al. Vapor Transport Deposition of Antimony Selenide Thin Film Solar Cells with 7.6% Efficiency. *Nat. Commun.* **2018**, *9*, 2179.
